# Supplementary material
Source: PubMed Central journal article supplement (PMC2997820)

## Supplementary Material

**Supplementary Table 1:** Antibodies used for IHC and Western Blot analyses.

| Immunohistochemistry |                        |         |               |                                                 |                              |                                               |
|----------------------|------------------------|---------|---------------|-------------------------------------------------|------------------------------|-----------------------------------------------|
| Ab                   | Clone # or Serum       | Species | Source        | Antigen Retrieval                               | Dilution and incubation      | Fixation                                      |
| PNA                  | #B-1075                | peanut  | Vector        | Citrate steam <sup>1</sup>                      | 5 ug/ml, 1 hr at R.T.        | Formalin <sup>3</sup>                         |
| Cyclin D3            | #sc-182                | rabbit  | Santa Cruz    | 1 mM EDTA, pH 7.5, 15 min in steam <sup>2</sup> | 1:3000, overnight at R.T.    | Formalin or Frozen PFA <sup>4</sup> overnight |
| CD21/<br>CD35        | #553817                | rat     | BD Pharmingen | Citrate steam                                   | 1:5000, 2 hrs at R.T.        | Frozen, 2% PFA 10 min                         |
| B220                 | Clone RA3-6B2          | rat     | BD Pharmingen | Citrate steam                                   | 1:20, 2 hrs at R.T.          | Formalin                                      |
| CD79a                | Clone JCB117           | mouse   | Dako          | 1 mM EDTA, pH 7.5, 10 min in steam              | 1:100, 2 hrs at R.T.         | Formalin                                      |
| CD3                  | Serum                  | rabbit  | Dako          | As per insert                                   | Undiluted, 2 hrs at R.T.     | Formalin                                      |
| Bcl6                 | #sc-858                | rabbit  | Santa Cruz    | 1 mM EDTA, pH 7.5, 15 min in steam              | 0.1 ug/ml, overnight at R.T. | Formalin                                      |
| Ki67                 | #NCL-ki67P             | rabbit  | Novocastra    | 1 mM EDTA, pH 7.5, 15 min in steam              | 1 to 500, 2 hrs at R.T.      | Formalin                                      |
| Western Blot         |                        |         |               |                                                 |                              |                                               |
| Ab                   | Clone/Catalog #        |         | Species       | Source                                          | Dilution                     |                                               |
| Cyclin D2            | sc-593 (M-20)          |         | rabbit        | Santa Cruz                                      | 1:1000                       |                                               |
| Cyclin D3            | sc-182 (C16)           |         | rabbit        | Santa Cruz                                      | 1:1000                       |                                               |
| Cyclin E             | Sc-481 (M-20)          |         | rabbit        | Santa Cruz                                      | 1:1000                       |                                               |
| Cdk4                 | Ab-6 (DCS-31 + DCS-35) |         | mouse         | NeoMarker                                       | 1:500                        |                                               |
| CDK6 (K6.83)         | AHZ0232                |         | mouse         | Biosource                                       | 1:250                        |                                               |
| Rb                   | sc-50 (C-15)           |         | rabbit        | Santa Cruz                                      | 1:200                        |                                               |
| pRb (S807/811)       | #9917                  |         | Rabbit        | Cell Signaling                                  | 1:500                        |                                               |
| beta-actin           | ab8229                 |         | goat          | abcam                                           | 1:500                        |                                               |

<sup>1</sup>Citrate steam indicates Vector Laboratories Antigen Unmasking Solution (cat. #H3300) in a vegetable steamer for 20 minutes, followed by 30-60 minutes of cooling at room temperature.

<sup>2</sup>EDTA indicates 1 mM EDTA pH 7.5 boiled in a microwave for ~ 6 minutes, followed by 15 minutes of simmering on low power.

<sup>3</sup>Formalin indicates 10% Neutral Buffered Formalin overnight.

<sup>4</sup>PFA indicates freshly prepared 2% paraformaldehyde.

**Table S2. Sequences of qRT-PCR primers.**

| Gene   |           | Sequence                      |
|--------|-----------|-------------------------------|
| HPRT   | sense     | 5' GCTGGTGAAAAGGACCTCT3'      |
|        | antisense | 5' CACAGGACTAGAACACCTGC3'     |
| Bcl6   | sense     | 5' TATTGTTCTCCACGACCTCACG3    |
|        | antisense | 5' ACTGTGAAGCAAGGCACTGG3'     |
| Ccnd2  | sense     | 5' AGACCTTCATCGCTCTGTGC3'     |
|        | antisense | 5' TAGCAGATGACGAACACGCC3'     |
| Trp53  | sense     | 5' GTATCCCGAGCATCTGGAAGA3'    |
|        | antisense | 5' CCCCATGCAGGAGCTATT3'       |
| Cdkn1b | sense     | 5' TCAAACGTGAGAGTGTCTAACG3'   |
|        | antisense | 5' CCGGGCCGAAGAGATTCTG3'      |
| Myc    | sense     | 5' GGGCCAGCCCTGAGCCCCTAGTGC3' |
|        | antisense | 5' ATGGAGATGAGCCCGACTCCGACC3' |

### Supplementary Figure Legends

**Figure S1. Histological validation of Cyclin D3 antibody and characterization of B cell splenic architecture in KO animals.** *A.* Double stain for B220 (brown) and Cyclin D3 (blue) of immunized mouse spleen sections demonstrates that the polyclonal cyclin D3 antibody is specific for this antigen. Intensely staining Cyclin D3<sup>+</sup> subcapsular cells are evident in WT spleen (arrowheads) but are absent from the subcapsular and interfollicular regions of *Ccnd3*<sup>-/-</sup> spleen. *B.* Hematoxylin and eosin (H&E) stain of spleens from SRBC-immunized mice indicate that splenic architecture is grossly normal in the absence of cyclin D3, with white and red pulps appropriately organized. *C.* B220 staining (brown) from a separate experiment indicates that the architecture of B cell follicles is preserved in the absence of

cyclin D3. Occasional cyclin D3<sup>+</sup> cells outside the follicles (arrowhead) are visible in the WT but not in the KO section. Scale bars are 100  $\mu$ m in *A* and are 200  $\mu$ m in *B* and *C*.

**Figure S2. Schematic illustration of the immunization and bleeding schedule used to elicit T-cell dependent anti-NP response in Figure 4.** Ten-twelve week old littermate were immunized with NP-KLH following a previously described protocol, as were ELISA for resting serum Ab and NP-specific Ab response (1).

**Figure S3. Class Switch Recombination to IgG<sub>1</sub> is moderately impaired in the absence of cyclin D3.** Splenic B cells from WT and cyclin D3 KO mice were isolated and stimulated as described (2). After 4 d of culture, CSR was analyzed by surface staining for IgM, IgG<sub>1</sub> and IgG<sub>3</sub>, followed by flow cytometry (3). *A*. Representative CSR results showing LPS+IL-4 induced switching from IgM to IgG<sub>1</sub>. *B*. Cyclin D3 KO B cells were moderately impaired in their IgG<sub>1</sub> switching efficiency but switched normally to IgG<sub>3</sub> in response to LPS stimulation. Statistical analysis using the linear mixed effects model (described in the MATERIALS AND METHODS of the main text) was performed on the flow cytometry data (the percent of IgG<sup>+</sup> cells in each well). Graph depicts quantification of all CSR experiments (n = 8; IgG<sub>1</sub>, *p* = 0.02, IgG<sub>3</sub>, *p* = 0.46). Error bars are SEM.

## References Cited.

1. Ye, B. H., G. Cattoretti, Q. Shen, J. Zhang, N. Hawe, R. de Waard, C. Leung, M. Nouri-Shirazi, A. Orazi, R. S. Chaganti, P. Rothman, A. M. Stall, P. P. Pandolfi, and R. Dalla-Favera. 1997. The BCL-6 proto-oncogene controls germinal-centre formation and Th2- type inflammation. *Nat Genet* 16:161-170.
2. Bardwell, P. D., C. J. Woo, K. Wei, Z. Li, A. Martin, S. Z. Sack, T. Parris, W. Edelmann, and M. D. Scharff. 2004. Altered somatic hypermutation and reduced class-switch recombination in exonuclease 1-mutant mice. *Nat Immunol* 5:224-229.

3. Li, Z., C. Zhao, M. D. Iglesias-Ussel, Z. Polonskaya, M. Zhuang, G. Yang, Z. Luo, W. Edelmann, and M. D. Scharff. 2006. The mismatch repair protein Msh6 influences the in vivo AID targeting to the Ig locus. *Immunity* 24:393-403.

# Supplementary Figure S1

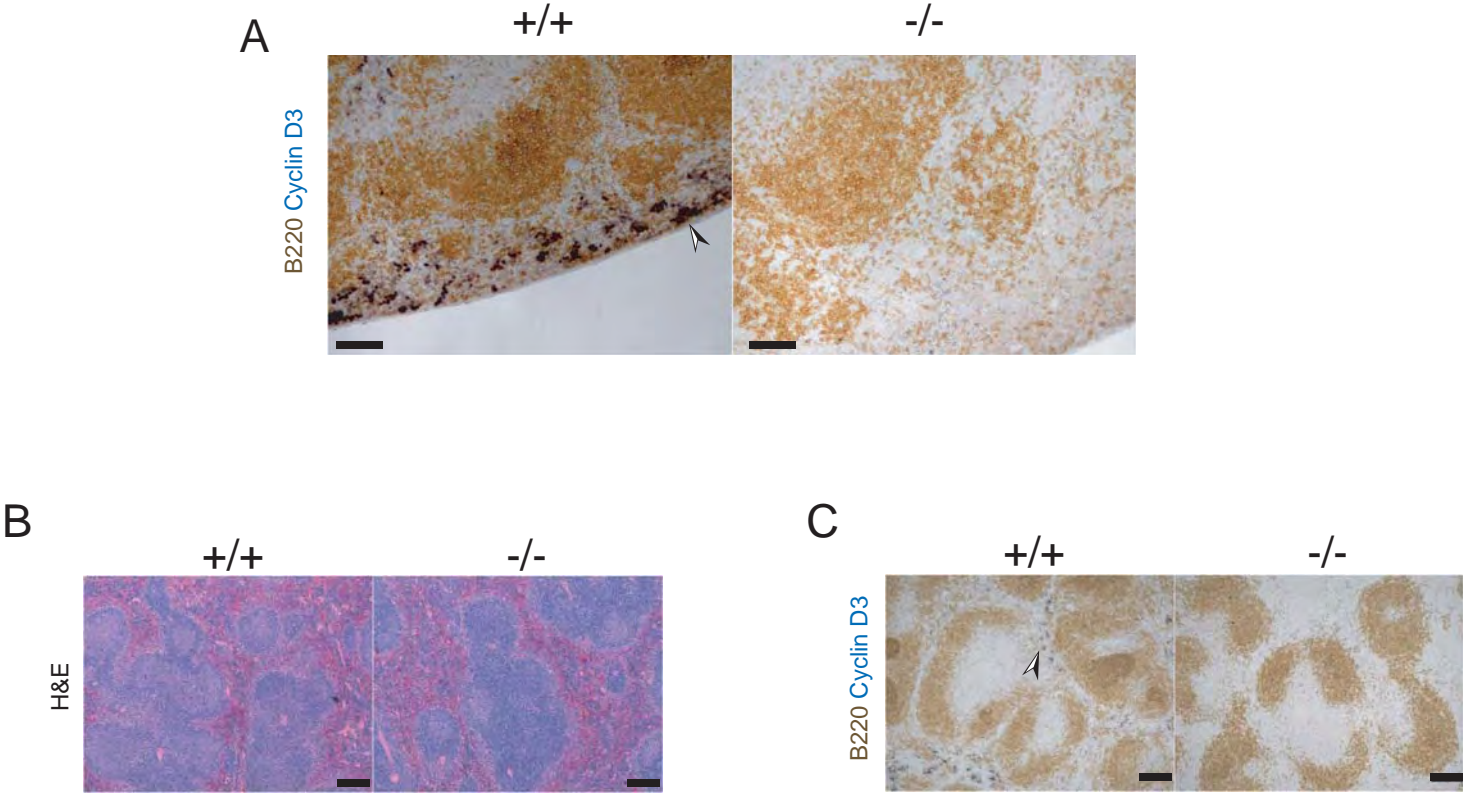

# Supplementary Figure S2

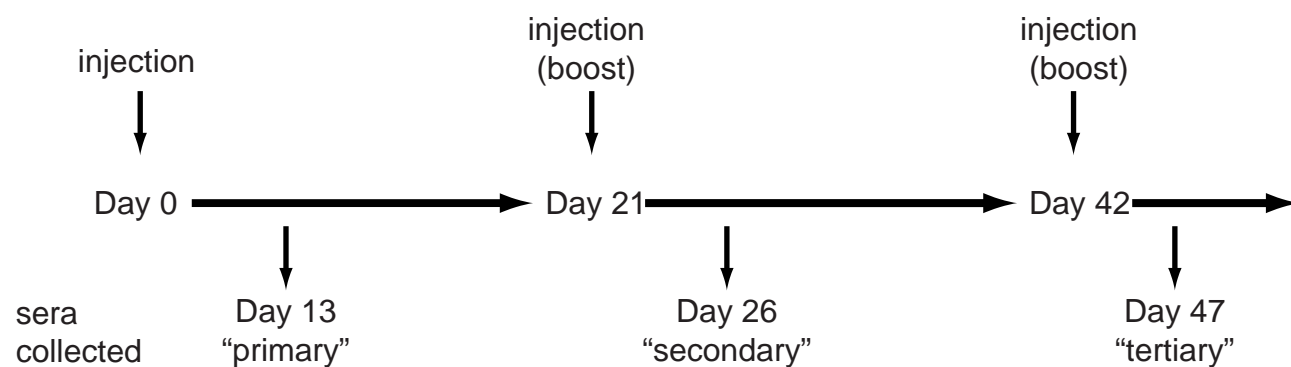

# Supplementary Figure S3

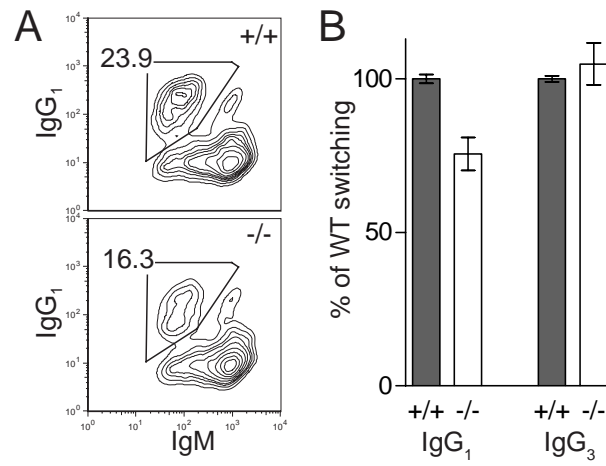

Supplement: NIHMS252142-supplement-Suppl_Material_and_Figures.pdf [file NIHMS252142-supplement-Suppl_Material_and_Figures.pdf]
